# Supplementary material for: Phylogenetic approaches to microbial community classification
Source: PubMed Central journal article supplement (PMC4593236; doi:10.1186/s40168-015-0114-5), 2015-10-05

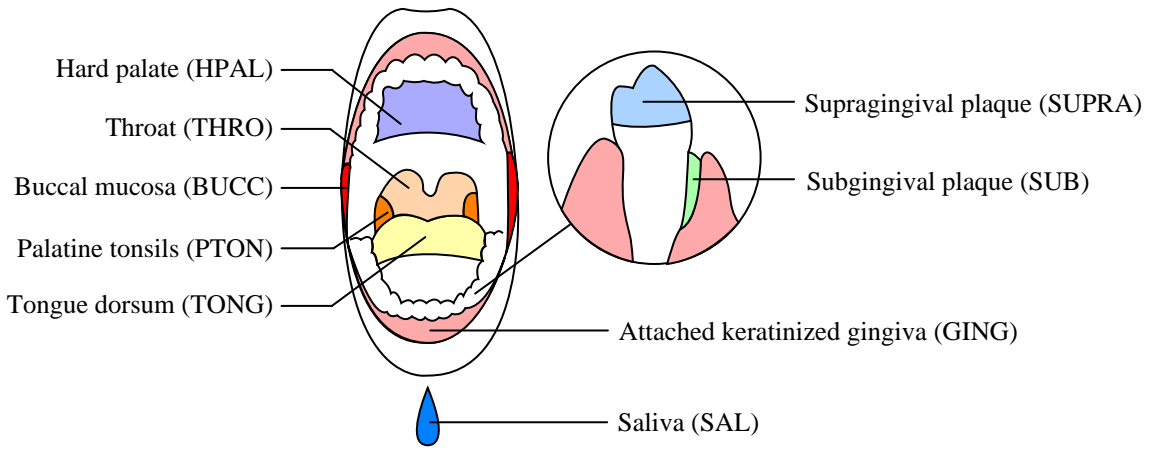

Supplement: 40168_2015_114_MOESM1_ESM.pdf [file 40168_2015_114_MOESM1_ESM.pdf]
