# Supplementary material for: Phylogenetic approaches to microbial community classification
Source: PubMed Central journal article supplement (PMC4593236; doi:10.1186/s40168-015-0114-5), 2015-10-05
Supplement: 40168_2015_114_MOESM4_ESM.pdf [file 40168_2015_114_MOESM4_ESM.pdf]

| <i>distance_measures</i>    | <i>otu_count</i> | <i>otu_abundance</i> | <i>rarefication</i> | <i>css_normalization</i> | <i>mean ±s.d</i> |
|-----------------------------|------------------|----------------------|---------------------|--------------------------|------------------|
| Canberra                    | 0.7623           | 0.7623               | 0.7662              | 0.769                    | 0.765 ±0.003     |
| Kulczynski                  | 0.7591           | 0.7574               | 0.7662              | 0.769                    | 0.763 ±0.005     |
| Bray-Curtis                 | 0.7574           | 0.7574               | 0.7662              | 0.769                    | 0.763 ±0.005     |
| Hellinger                   | 0.7558           | 0.7556               | 0.7728              | 0.7624                   | 0.762 ±0.007     |
| Soergel                     | 0.7591           | 0.7541               | 0.7562              | 0.7657                   | 0.759 ±0.004     |
| Pearson                     | 0.7426           | 0.7426               | 0.7512              | 0.7673                   | 0.751 ±0.010     |
| Morisita-Horn               | 0.7426           | 0.7426               | 0.7496              | 0.7673                   | 0.751 ±0.010     |
| unweighted UniFrac          | 0.7294           | 0.7459               | 0.7695              | 0.7294                   | 0.744 ±0.016     |
| Chi-square                  | 0.7442           | 0.7409               | 0.7363              | 0.7393                   | 0.740 ±0.003     |
| Normalized weighted UniFrac | 0.7277           | 0.7327               | 0.7512              | 0.7376                   | 0.737 ±0.009     |
| weighted UniFrac            | 0.7343           | 0.736                | 0.7396              | 0.7376                   | 0.737 ±0.002     |
| Gower                       | 0.7393           | 0.7508               | 0.6617              | 0.7558                   | 0.727 ±0.038     |
| Manhattan                   | 0.7079           | 0.7277               | 0.6202              | 0.7591                   | 0.704 ±0.052     |
| Euclidean                   | 0.6947           | 0.736                | 0.6219              | 0.7541                   | 0.702 ±0.051     |
| mean ± s.d.                 | 0.740 ±0.019     | 0.746 ±0.010         | 0.731 ±0.052        | 0.756 ±0.014             | /                |
